# Supplementary material
Source: Springer Nature journal article supplement (https://www.springermedizin.de/resource/supplementary/13256_2010_1395_MOESM3_ESM.pdf/9648046)

n,  
r(s) 8 month(s)

Sir  
L

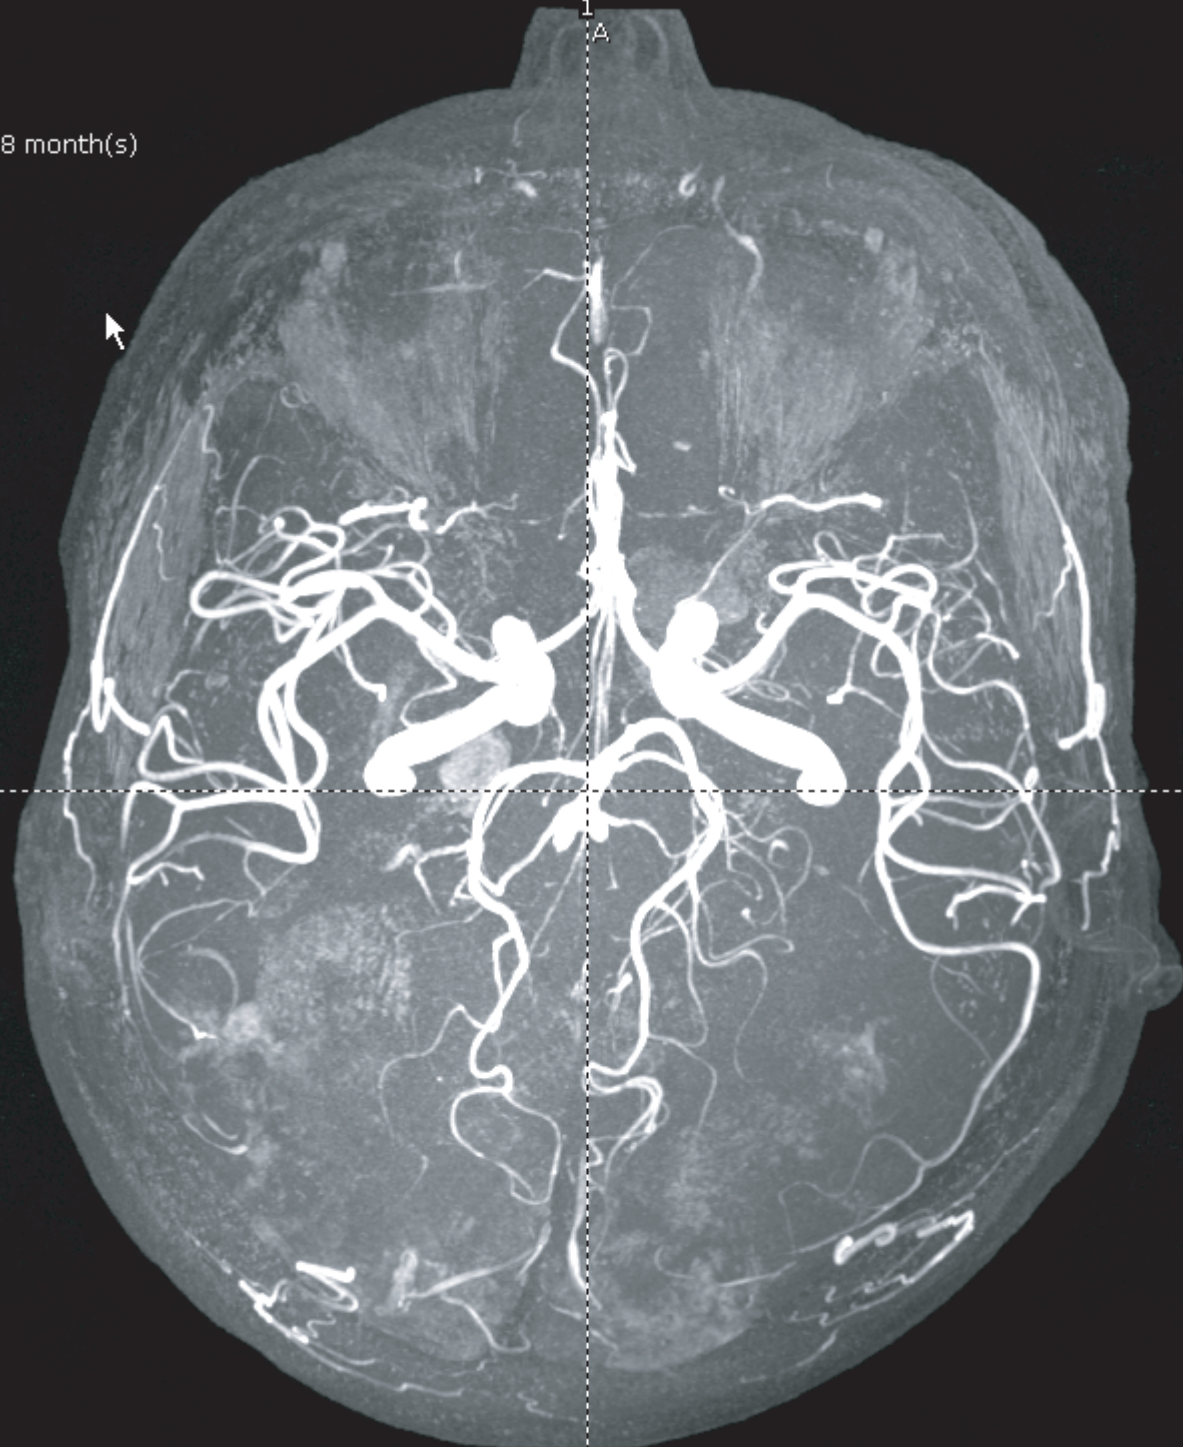

Supplement: MOESM3 [file 9648046]
